# Supplementary material for: Identification of further variation at the lipooligosaccharide outer core locus in Acinetobacter baumannii genomes and extension of the OCL reference sequence database for Kaptive
Source: PubMed Central journal article supplement (PMC10327509; doi:10.1099/mgen.0.001042), 2023-06-13
Supplement: mgen-9-1042-s001.pdf [file mgen-9-1042-s001.pdf]

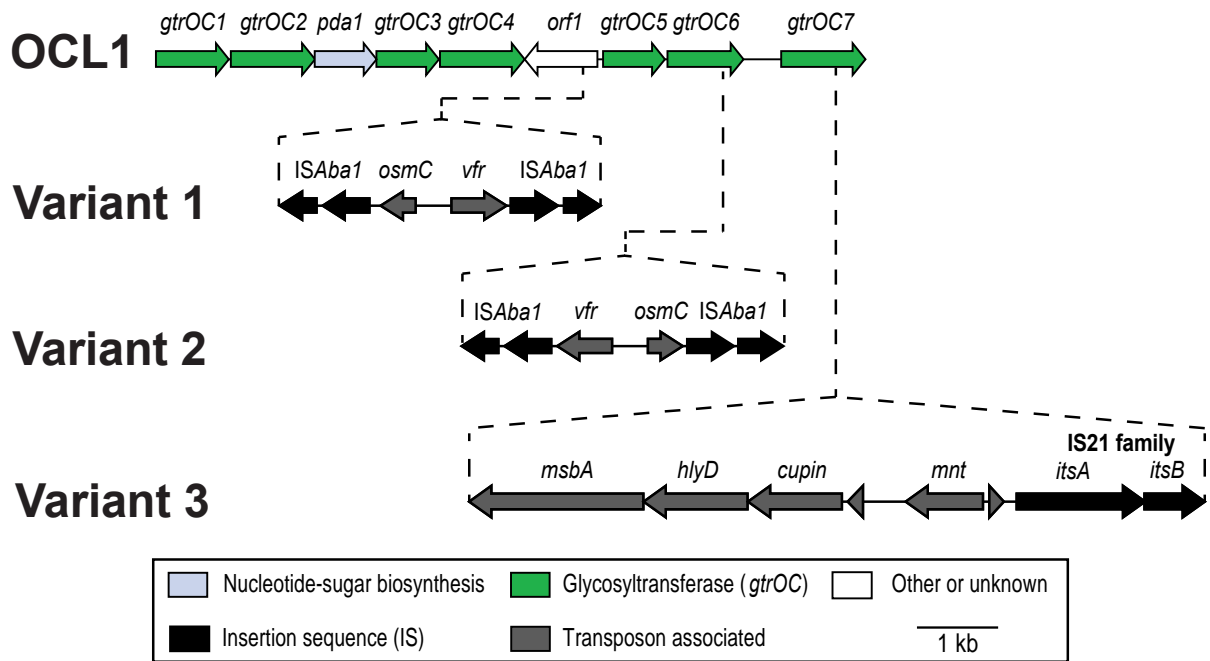

**Figure S1. Transposon variants identified interrupting OCL1 indicating their specific insertion sites.** Drawn to scale from NCBI accession numbers GCA\_000516095.2 (variant 1), GCA\_004101685.1 (variant 2), and GCA\_021569095.1 (variant 3). Insertion sequences are black and other genes are grey. OCL1 colour scheme is shown in the legend below.

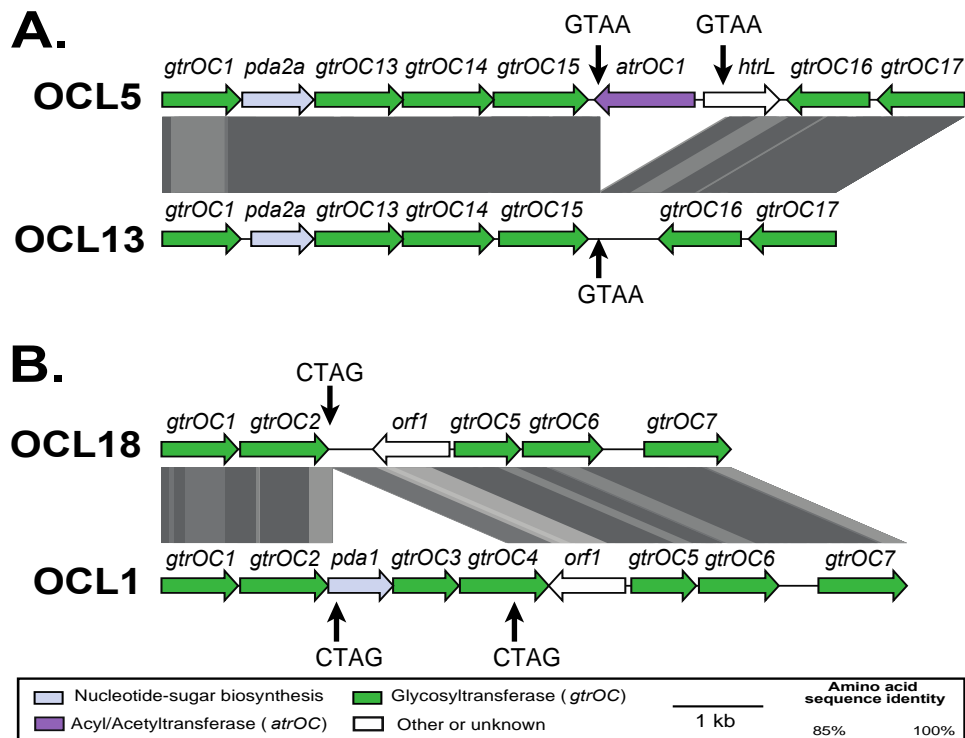

**Figure S2. Comparison of *A. baumannii* OCL that include a 4 bp repeat influencing *Kaptive* assignments. A.** Alignment of OCL5 and OCL13. **B.** Alignment of OCL18 and OCL1. Vertical black arrows indicate positions of the 4 bp repeats. Horizontal arrows are genes showing the direction of transcription, colour coded by the predicted function of their gene products. Grey shading between gene clusters shows amino acid sequence identity determined by tblastx. Colour scheme and grey scale are shown below. Figures drawn to scale using Easyfig [20] and annotated/coloured in Adobe Illustrator.
